# Supplementary material for: Vibrio splendidus AJ01 Promotes Pathogenicity via L-Glutamic Acid
Source: MDPI journal article supplement (doi:10.3390/microorganisms11092333), 2023-09-17
Supplement: s1 [file s1]

>*vsm*

ATGAACCAACAACGTCAATTAAGCTGGAAAATAGCAGCTATTCTAGGTACATCTTTTGGCTT  
TACTGCACACGCTGCAGAGATGGTCAGAGTCGATAATGATGCATTACTACAACAAAGCCTC  
GTCGCGCAGTCGAAGAGTGTTGCTCCACTTGAATTAGGTTTTTCTGAAGTTAAACGGGTGG  
TATTACCCAATGGAAAAACGAAAGTCCGCTACCAACAACTCACTTAGGTTTACCCGTCTTT  
GATACTACGGTCGTGGCCACCCTCTCCAAGAACCAACCCACTCAGGTGTTTCGGGTCAATGG  
CACAAGGCATCAGTGGTGACCTATCCAGCATCGCGCCAAAGCTGAATCAGGAACAAGCGAT  
TGAAGCCGCACTGTCCGCTCATCGCACGTTTACCGTCGGCAAAAAGTCCATTGAAAATAAA  
AATGCCAAACTGATGGTGAGATTGGATGAGAACCAAGTTGCCCAAGTGGTGTATCTGGTCG  
ATTTCTTTATCGCGTCCTCAATACCAGAGCGCCCTTTCTACTTTATTGATGCTACGACTGGCG  
ATGTTCTCCAAAAATGGAATGGGTAAACCACGCTAAAGCATTAGGTACTGGCCCAGGTGG  
CAACCTCAAAACCACTCGATATGAATATGGCAGTGACTTCCCTAGCTTTCCCATCGACAAAA  
CAGGCACGACATGTAAGTTAGAAAACGATTTCGGTTAAAACCGTCGATTTGAGGAACGGAA  
CGTCCGGCAGCGCAGCCTACAGTTACAACGTGCTGATGGAACCAACTACACCGACCATAA  
GTACATTAACGGGGCTTACTCGCCTCTTAATGATGCGCACTACTTCGGTAATGTTCGTATTTGA  
TATGTACAAAGAGTGGATGAATACGTCGCCTTTAACTTTCCAGCTGACGATGCGAGTTCATT  
ACGGCACGGATTATGAAAATGCCTTCTGGAATGGTACATCCATGACTTTTGGAGATGGCAAA  
AATACCTTTTACCCATTAGTCGATATTAACGTGAGTGCTCACGAAGTCAGCCACGGGTTTAC  
AGAGCAAAACTCCGGTCTTGTGTACCAAAATATGTCGGGCGGTATGAATGAAGCCTTCTCA  
GACATTGCGGGCGAAGCGGCTGAATACTACTTGCCTGGTAATGTGGATTGGTGGTCGGTA  
GCGATATATTCAAATCTGAAGGTGGCTTGCCTTACTTTGATCAACCTTCAAAGATGGCCGC  
TCGATTGACCATGCCTCTCAATACTACGATGGTTTGAACGTTCACTTGTCTAGCGGTGTTTAT  
AACC GCGCCTTTTACCTTTTAGCGAACAAGTCTGGCTGGGATGTGCGTAAGGGCTTTGAAAT  
ATTCACAGTCGAAACCAATTGTATTGGACGGCAAACAGTACCTTTGATGCCGGAGCTTGT  
GGCGTAGCGAAAGCCGCAGCAGACATGGGCTATGTGGTTGCCGATGTTGAAGATGCTTTTA  
ATACGGTAGGCGTTAATGCAAGCTGTGGTGTAACGCCTCCAACCTGGTAATGTGCTGACGAA  
AGGCACACCGATTGCGAACCTAAGCGGGAATCAATCTTCAGAGAAGTCTACACGTTACC  
GTAGATTCTGTATCAAGCGTGACGGTTTCAATGTCTGGCGGTTACAGGCGATGCCGACCTTTA  
CGTTAAATCGGGAAGCAAGCCAACGACATCAAGTTACGACTGTCGCCCTTATCGTGCTGGA  
AACAATGAGCAGTGCAGTGTAAGCGCTCAACCGGGCGTGACTTATCATGTGTTACTCCGAG  
GGTACTCTAACTATTCTGGCCTAACGTTACGTTTAGATTGA

>*vspC*

ATGCTTGCCAGTGTGTCCAGTTTCTCTTTTGTCAAATCAGTGTGAGGTGCTTGATCTACA  
ACAGGCGTCCGATCTTGCACCTCGCTGTCTCTTCGGCAGGCAACCGTTGCTACAGTTCTTGG  
TTCTCTGCATCGGATAATTCAGTAGATAATATCTATAGCGAAGCGAGCCTAAGCCGTATTCAA  
GTGGCGCTGAACTTAGAAATAGCCCGTTATCGAGGTGAAGCTGAACAAGCACGTAAACTTG  
AAAACCTTGGTGAGTTTGTTCGCGCTGCTTATTACGTTTCGCTATAACGCGCAAACACAGGAT  
TTCTCTGAGGCGTTAAGCCAGCGATTTGCTCAATCTACCAATGCTTTTCTAGCGACCCCTAAT  
GCGCAGGACCAAGGACGAGAACAAGTCGGGGCAATGAAAAGTCTGACGTTGATGGTCGAT  
AACGTTAAGCAACTTCCACTCACTATGGATGCGCAACTTGCGGCACTTAGACACTTTAATCA  
AGAAACGGCGCAAGACTCACAATGGGTCGACGGGCTAAATAATCTGTTCCGAGCAATGGC  
AGGACATGCAGCCCGAGATGACTTCTACGATTACATGGCCAGTCATACTCAACATATCGATA  
CGTAGCGGCATTTCGCTCGTGATAATACGTGGGCTTTAGATACTGATGCGAGCTTCCTTGTTT

ATAACGCAGTGCGTGAAACTGGTCGTTTTCTGGCAAGCCCAGATAAAGCCACCAAAGATAA  
AGCACTGCAAGTTATGCAGCAGGTGATGGTGCAAAACCCATTGGGCAGCGAGCACGATAA  
GCTATGGTTAGCGGCGGTTCGAGATGATGAGTTACTTTGCGCCAGAAGGCTTAAATGGGTTA  
GATCTCGAGCAAGCAAAACGTGATTTAGCAACGCGTGTACTTCCCAATCGTCATGAGTGCC  
AAGGGCCTGCGATTATTCGCTCACAAGATTTAACGCAAGCACAAGCGATGGAAGCTTGTA  
TGTGTTGGCCGCCAAAGAGGCCGATTTCCACCAAGTCGCGAACACGGGTCAACAACCTGT  
CGCCGACGATAACAATAACCGAGTTGAAGTGGCGGTGTTCGGCAGCAAAGGCAGTTATATC  
GATTACTCGTCGTTCTTATTTGGTAATACTACCGATAACGGCGGACAGTACTTAGAAGGCAA  
CCCTGCAGAGGTGGGGAACGTGGCGCGTTTCGTGGCTTACCGTTACGCCAATGGCGATGAC  
CTCTCTATTCTCAACTTAGAACATGAATACACTCATTATCTCGATGCGCGCTTTAACCAATAT  
GGCTCCTTTAGCGACAACCTTGGCTCATGGTTATGTGGTGTGGTGGTTAGAAGGTTTTGCCGA  
ATTCATGCATTACAAGCAAGGCTACGATGCTGCGGTAAGCTTGATTAACAGCGGGAAGATG  
AGCCTGTGCGATGTGCTTGCAACCACTTACTCCCATGATGCTAATCGTATCTACCGATGGGG  
CTACTTAGCGGTACGCTTTATGATGGAAGAACATCCTCAAGAGGTGCAGAGCTTGTTGGCA  
CTGTCTCGTACTGGCCAATTTTCCAAATGGGCGCAACAGGTGAAAGTGCTTGGCCAGCAAT  
ACAATGGTGAGTTTGAGCGTTGGTTAGACACCGTTTCAAGTGAACCAACAGAGCCTACTGA  
TCCCGCAGATCCGATTGACCCTACCAATCCGACAGACCAAGCCATGGTACTTACAGCAAAC  
CAAAGTGTGGTGTGTAACGGCAAGGCGTACAGCGAGCAGTTGTTCTACGTCGATGTACCAG  
AGAACACTAGGCATTTTGAGGTTTTGATTGAAGGAGAAGTTCAAGGTGATGCTGATCTTTA  
CATGAGCTACAACAACAAGCACATTACTATGACTTTGAATTCAGCCAATATCACAATGGCA  
GTAATGAGATGGTGACGTTTGAGCCAGAGGCATCAGGCTACATTAAACCGGGTCGCTACTA  
CATGAGTATTGCAGGGCGCACCGATTTCAATGACGTGACACTGTTAGCATCGCTAGAGACA  
GAAACACCGACACCTCCATCACAAGAACAAGACGACTTAACGCCCCGTAGTATTGGAATCCG  
GTCAGGATCAAGTATTGACTGTGCATCAACGACGTTATGCAGCAGTCTATGTGCCAGAGGG  
CGTACAAGAGGTGCGAGTGTGGTTGAACGATAAGAGTGACAATGCGGAGAATGGACAGTC  
GAATACAGGTAATGTTGATCTGTTTGCAAGCCATTCATATTGGCCAACAGCAGGACAACATG  
ACTATGCATCGGATTATCGAGGCAGTAATGAATACCTACAAATTCCTGTAACAGAAGAAGGC  
TATTTGCACTTCTTACTCAGTGCAGAACAGCAAGGGGATGATGTCGAAATGTTGGTTTATTT  
TCACTAG

*>fliC*

ATGCTGAACCAATCTTTGGAGCGCTTAGCTTCAGGGAGTCGTATTAATAGTGCAAAAGACGA  
TGCGGCTGGCTTACAAATTTTGAATCGACTGGAAGCGCAGATGAGCGGCATTGATGTCGCG  
GTTTCGGAACGCTAACGACGGAATCTCCATTATGCAGACTGCAGAAGGGGGCGATGAACGAA  
ACCACCAATATCATGCAACGCATGCGAGATTTGTCACTGCAAGCGAGTAATGGTTTGAATAG  
TCAGTCAGAAAGGACGGCGATTCAAGAAGAAGTGACAGCTCTAAATGATGAGTTGAATCG  
AATTGCTGAAACCACTTCATTGGCGGTAAAAAATTCTTAACGGTAGTTTTGGTAGCTCAT  
CATTTCAAATCGGTGGCAGTTCTGGTGAAGCGGTGCAGATAGGCTTGAAAAATATGCGCAC  
CGATGATATCAACATGGGGGGCTTTAGCTATGTCGCTAATGGCATGGCCAGCGACTCGTGGG  
AAGTCAAACCCGACCAGAACGATATTACGATGTCGTTACCGACCGTTTTGGTCAGCCACA  
AGAGATCACCATCAACGCGAAAGCGGGCGATGATATTGAAGAGTTGGCGACTTACATTAAT  
GGTCAAACGGATCTGGTCTCGGCTTCTGTCAACGATGAAGGGCAACTTCAGATCTATATGTC  
AGGTGAAGACACGGCAGGCACGATCTTTTCTCAGGTTCGTTAGCCAGTGAGCTTTTCGATG  
TCGGTGGGTTATTACGAATCAGTCGATGACATCAATGTGACCGATGTGGGTGGAGCGCAGC

GTGCTGTCTCTATTTTGGACACCGCGATGAAGTATGTAGACAGTCATCGATCCGAATTAGGC  
GCGATGCAAAACCGCTTTGACCATGCAATAAACAATCTCGAAAACGTTTCATGAGAACTTGG  
CGACATCCAACAGCCGAATCAAAGATACCGACTACGCCAAAGAACTACTCAAATGCTCAA  
GCAGCAAATACTGCAGCAAGTGAGTACCACAATATTGGCTCAAGCAAAGCAAGCGCCGAA  
TCTTGCCTTAACCTTACTGGGTAA

*>hop*

ATGGAAGTGGAACTTTACTAAACACGCTGACGCAAGCCCCAGAAAGCATTCAATTTGAAG  
ATACGATGCAGGTGATCGAGGCGAACTATGACTTTTCTGAGAGTGAGTTTCGCAATGGTGAT  
GTAGTTAATGTGGCGGGACAGAACAATGGTTCGTGTAAGATTTTGGCTTTTGGTTTAGCTCA  
AGATCTTTCTCCGAGCAAACACTGGCTTGTTTTGGGCAGTTTATCGCAACGATGTATTAG  
GTTTTCTGAGAATACCGACCATCAAAACATTCGTAATTTATGATTCATGGTTGGAGTGGTG  
TACAGTTTTCTCAGCCTGCGCTGACGGTAAAAGCGAAGTAA

*>vshppd*

ATGGTGGATACATACAACCCGCTTGGTACGGATGGATTTCGAGTTTGTGGAATACACAGCTGT  
CGACCACAAGGGAATTGAGCAACTTAAAGCGCTGTTTGTGTCACTTGGTTTTGCTGAGATC  
GCCAAGCACCGTTCAAAAGAGGCTTGGCTGTATCGACAAGGTGACATTAACCTTTATCGTCA  
ATGAACAACCACACAGCCAAGCGGAAGCGTTTCGCTAAAGTGCATGGTCCATCGGTGTGTG  
GCATGGCTTTTCGTGTCAACGAAGCAACCGCTGCTATGGATCAAGCGTTCAAGGGCGGTGG  
TGAAGAGTACAAGACAGAAATCGGGCCGATGGAGCTGAGTATTCCTGCCATTTACGGTATC  
GGTGAAAGCCTGCTCTATTTTGTGGATCGCTATGGTAAGCAGAGTATCTATGACGTCGATTTT  
CGATTCTACGATGATGCAGAGGAGCGCATGGCCGAAGCCAATGTTGGCTTGTATGAAATTG  
ACCATCTGACGCACAACGTTAAGCAAGGCAACATGGATGTGTGGTCTGGGTCTATGAGCG  
TCTTGGTAACTTCCGTGAGATTCGATACTTCGATATTGAAGGTAAGCTGACAGGCCTTGTGA  
GCCGTGCAATGACCTCCCCATGTGGCAAGATTGCAATCCCAATCAATGAGTCTTCAGATGAC  
AAATCACAAATTGAAGAGTTCATCCGCGAATACAACGGCGAAGGCATTCAACACATCGCGC  
TTGCAACGGATGACATCTACAAAACCGTCAAAACCCTGCGTGATCGCGGCATGGACTTTAT  
GCCAACTCCTGATACTTATTACGAGAAAGTTGACGATCGTGTGAAAGGCCACGGAGAAGAC  
ACTGATCTGCTGCGCGAGCTACGCGTTCTGATTGATGGTGCGCCGACCAAAGACGGCATCT  
TACTGCAAATTTTCACGCAGACCGTAATCGGGCCTGTGTTCTTTGAAATCATTACGCGTAAA  
GGCAACGAAGGCTTTGGCGAAGGTAACCTCAAGGCGTTGTTGCAATCGATTGAAGAAGAC  
CAGATTCGTCGAGGAGTATTAGACGATGCATAA
